# Supplementary material for: Hole in One: an element reduction approach to modeling bone porosity in finite element analysis
Source: PeerJ journal article supplement (doi:10.7717/peerj.8112), 2019-12-19
Supplement: Table_S2_staff_file_EP.docx [file Table_S2_staff_file_EP.docx]

| **16.5 % DELETION** | | | | | | | | | | |
| --- | --- | --- | --- | --- | --- | --- | --- | --- | --- | --- |
|  | **1** | **2** | **3** | **4** | **5** | **6** | **7** | **8** | **9** | **10** |
| **I** | 44,86 | 61,65 | 57,68 | 53,73 | 63,23 | 57,91 | 55,11 | 48,36 | 40,89 | 29,53 |
| **II** | 47,45 | 52,94 | 58,42 | 68,74 | 62,31 | 58,26 | 63,99 | 51,27 | 40,39 | 41,99 |
| **III** | 41,21 | 53,38 | 57,83 | 60,96 | 59,29 | 63,35 | 63,84 | 56,35 | 41,15 | 41,97 |
| **IV** | 42,40 | 56,26 | 64,02 | 58,20 | 57,48 | 63,84 | 70,69 | 106,49 | 324,10 | 475,09 |
| **V** | 37,33 | 49,04 | 67,34 | 63,56 | 57,55 | 56,08 | 63,62 | 48,76 | 29,19 | 46,22 |
| **mean** | 42,65 | 54,65 | 61,06 | 61,04 | 59,97 | 59,89 | 63,45 | 62,24 | 95,15 | 126,96 |
| **stdev** | 3,82 | 4,68 | 4,39 | 5,64 | 2,67 | 3,49 | 5,53 | 24,94 | 128,09 | 194,71 |
| **sterr** | 1,71 | 2,09 | 1,96 | 2,52 | 1,20 | 1,56 | 2,47 | 11,15 | 57,28 | 87,08 |
| **95% CI** | 4,02 | 4,92 | 4,62 | 5,93 | 2,81 | 3,67 | 5,82 | 26,24 | 134,79 | 204,89 |
