# Supplementary material for: Hole in One: an element reduction approach to modeling bone porosity in finite element analysis
Source: PeerJ journal article supplement (doi:10.7717/peerj.8112), 2019-12-19
Supplement: Table_S3.docx [file Table_S3.docx]

| **I** | | | | | | | | | | | | |
| --- | --- | --- | --- | --- | --- | --- | --- | --- | --- | --- | --- | --- |
| **Nodes** | **T1** | | **T2** | | **T3** | | **T4** | | **Mean** | **stdev** | **sterr** | **95% CI** |
| 1 | 46.00 | 2408 | 46.90 | 2420 | 50.48 | 2432 | 48.80 | 2445 | 50.15 | 3.20 | 1.43 | 3.37 |
| 2 | 55.83 | 2504 | 56.92 | 2516 | 57.09 | 2528 | 57.33 | 2541 | 54.34 | 5.56 | 2.48 | 5.85 |
| 3 | 54.43 | 2456 | 60.29 | 2564 | 61.86 | 2624 | 55.41 | 2685 | 58.35 | 3.22 | 1.44 | 3.39 |
| 4 | 60.59 | 2600 | 61.65 | 2660 | 62.79 | 2720 | 64.01 | 2781 | 62.26 | 4.30 | 1.92 | 4.53 |
| 5 | 58.94 | 2696 | 60.48 | 2756 | 57.56 | 2816 | 56.71 | 2877 | 58.42 | 1.65 | 0.74 | 1.74 |
| 6 | 53.21 | 2792 | 60.96 | 2852 | 65.67 | 2912 | 59.11 | 2973 | 59.74 | 5.16 | 2.31 | 5.43 |
| 7 | 62.05 | 2888 | 55.25 | 2948 | 49.22 | 3008 | 50.95 | 3069 | 54.37 | 5.72 | 2.56 | 6.02 |
| 8 | 50.62 | 2984 | 57.59 | 3044 | 32.63 | 3104 | 40.77 | 3165 | 45.40 | 10.96 | 4.90 | 11.53 |
| 9 | 39.56 | 3080 | 28.30 | 3140 | 30.27 | 3152 | 28.78 | 3213 | 31.73 | 5.29 | 2.36 | 5.56 |
| 10 | 28.90 | 3176 | 30.97 | 3188 | 24.05 | 3200 | 32.19 | 3261 | 29.03 | 3.59 | 1.60 | 3.78 |
| **II** | | | | | | | | | | | | |
| **Nodes** | **T1** | | **T2** | | **T3** | | **T4** | | **Mean** | **stdev** | **sterr** | **95% CI** |
| 1 | 50.71 | 2445 | 48.03 | 2409 | 46.22 | 2421 | 48.32 | 2433 | 48.32 | 1.84 | 0.82 | 1.94 |
| 2 | 58.03 | 2541 | 57.94 | 2505 | 59.10 | 2517 | 62.61 | 2529 | 59.42 | 2.19 | 0.98 | 2.30 |
| 3 | 60.13 | 2637 | 60.97 | 2601 | 58.38 | 2613 | 57.63 | 2625 | 59.28 | 1.54 | 0.69 | 1.62 |
| 4 | 58.71 | 2733 | 58.33 | 2697 | 61.84 | 2709 | 59.39 | 2721 | 59.57 | 1.58 | 0.70 | 1.66 |
| 5 | 65.68 | 2829 | 58.53 | 2793 | 63.37 | 2805 | 65.80 | 2817 | 63.34 | 3.40 | 1.52 | 3.58 |
| 6 | 57.33 | 2925 | 55.81 | 2889 | 64.21 | 2901 | 56.02 | 2913 | 58.34 | 3.97 | 1.77 | 4.17 |
| 7 | 53.17 | 3021 | 59.79 | 2985 | 49.35 | 2997 | 55.19 | 3009 | 54.37 | 4.35 | 1.94 | 4.57 |
| 8 | 37.77 | 3117 | 40.82 | 3081 | 40.52 | 3093 | 39.11 | 3105 | 39.55 | 1.40 | 0.63 | 1.47 |
| 9 | 29.19 | 3213 | 32.20 | 3177 | 30.06 | 3189 | 26.06 | 3201 | 29.38 | 2.55 | 1.14 | 2.68 |
| 10 | 42.12 | 3261 | 46.33 | 3225 | 42.90 | 3237 | 35.26 | 3249 | 41.65 | 4.64 | 2.07 | 4.88 |
| **III** | | | | | | | | | | | | |
| **Nodes** | **T1** | | **T2** | | **T3** | | **T4** | | **Mean** | **stdev** | **sterr** | **95% CI** |
| 1 | 46.59 | 2432 | 48.59 | 2444 | 44.53 | 2407 | 48.54 | 2419 | 47.06 | 1.93 | 0.86 | 2.03 |
| 2 | 55.50 | 2528 | 54.59 | 2540 | 64.43 | 2503 | 56.06 | 2515 | 57.65 | 4.56 | 2.04 | 4.80 |
| 3 | 59.58 | 2624 | 57.83 | 2588 | 55.89 | 2599 | 61.26 | 2611 | 58.64 | 2.30 | 1.03 | 2.42 |
| 4 | 58.42 | 2720 | 60.96 | 2684 | 58.17 | 2695 | 59.39 | 2707 | 59.23 | 1.26 | 0.57 | 1.33 |
| 5 | 68.04 | 2816 | 59.29 | 2780 | 61.40 | 2791 | 66.45 | 2803 | 63.80 | 4.12 | 1.84 | 4.34 |
| 6 | 59.23 | 2912 | 63.35 | 2876 | 55.06 | 2887 | 61.77 | 2899 | 59.85 | 3.62 | 1.62 | 3.80 |
| 7 | 43.94 | 3008 | 63.84 | 2972 | 46.85 | 2983 | 56.17 | 2995 | 52.70 | 9.07 | 4.06 | 9.55 |
| 8 | 29.76 | 3104 | 56.35 | 3068 | 35.90 | 3079 | 64.00 | 3043 | 46.50 | 16.29 | 7.28 | 17.14 |
| 9 | 25.13 | 3200 | 41.15 | 3164 | 26.11 | 3175 | 42.49 | 3139 | 33.72 | 9.38 | 4.19 | 9.87 |
| 10 | 34.22 | 3248 | 53.68 | 3260 | 30.13 | 3223 | 34.48 | 3187 | 38.13 | 10.56 | 4.72 | 11.11 |
| **IV** | | | | | | | | | | | | |
| **Nodes** | **T1** | | **T2** | | **T3** | | **T4** | | **Mean** | **stdev** | **sterr** | **95% CI** |
| 1 | 47.54 | 2412 | 47.60 | 2425 | 46.71 | 2436 | 45.54 | 2449 | 46.84 | 0.96 | 0.43 | 1.01 |
| 2 | 60.05 | 2508 | 57.56 | 2521 | 59.61 | 2532 | 57.99 | 2545 | 58.80 | 1.21 | 0.54 | 1.27 |
| 3 | 63.27 | 2604 | 55.96 | 2617 | 56.41 | 2628 | 61.79 | 2641 | 59.36 | 3.72 | 1.66 | 3.91 |
| 4 | 64.82 | 2700 | 66.18 | 2713 | 58.18 | 2724 | 59.13 | 2737 | 62.08 | 4.01 | 1.79 | 4.22 |
| 5 | 62.99 | 2796 | 61.77 | 2809 | 65.88 | 2820 | 62.38 | 2833 | 63.26 | 1.82 | 0.81 | 1.91 |
| 6 | 55.57 | 2892 | 60.41 | 2905 | 51.07 | 2916 | 58.52 | 2929 | 56.39 | 4.07 | 1.82 | 4.28 |
| 7 | 49.17 | 2988 | 61.26 | 3001 | 46.23 | 3012 | 65.13 | 3025 | 55.45 | 9.16 | 4.10 | 9.64 |
| 8 | 32.98 | 3084 | 46.80 | 3097 | 33.94 | 3108 | 47.23 | 3121 | 40.24 | 7.84 | 3.50 | 8.25 |
| 9 | 25.37 | 3180 | 40.78 | 3193 | 24.56 | 3204 | 37.67 | 3217 | 32.09 | 8.34 | 3.73 | 8.77 |
| 10 | 44.29 | 3228 | 50.53 | 3241 | 38.07 | 3252 | 54.68 | 3265 | 46.89 | 7.27 | 3.25 | 7.65 |
| **V** | | | | | | | | | | | | |
| **Nodes** | **T1** | | **T2** | | **T3** | | **T4** | | **Mean** | **stdev** | **sterr** | **95% CI** |
| 1 | 40.99 | 2432 | 42.52 | 2443 | 42.34 | 2408 | 49.49 | 2420 | 43.84 | 3.83 | 1.71 | 4.03 |
| 2 | 59.34 | 2528 | 58.00 | 2539 | 54.79 | 2504 | 61.65 | 2516 | 58.44 | 2.86 | 1.28 | 3.01 |
| 3 | 61.14 | 2624 | 54.89 | 2635 | 55.80 | 2648 | 59.73 | 2612 | 57.89 | 3.02 | 1.35 | 3.18 |
| 4 | 63.16 | 2720 | 63.74 | 2731 | 55.23 | 2744 | 62.49 | 2708 | 61.16 | 3.98 | 1.78 | 4.19 |
| 5 | 57.99 | 2816 | 57.00 | 2827 | 61.97 | 2840 | 62.79 | 2804 | 59.94 | 2.87 | 1.28 | 3.02 |
| 6 | 59.13 | 2912 | 57.49 | 2923 | 62.86 | 2936 | 59.93 | 2900 | 59.85 | 2.25 | 1.00 | 2.36 |
| 7 | 58.01 | 3008 | 59.16 | 3019 | 54.24 | 3032 | 58.36 | 2996 | 57.44 | 2.19 | 0.98 | 2.30 |
| 8 | 44.04 | 3104 | 48.37 | 3115 | 31.01 | 3128 | 43.70 | 3092 | 41.78 | 7.49 | 3.35 | 7.88 |
| 9 | 46.51 | 3200 | 37.16 | 3211 | 48.08 | 3176 | 37.90 | 3188 | 42.41 | 5.68 | 2.54 | 5.98 |
| 10 | 78.90 | 3248 | 74.91 | 3259 | 71.75 | 3224 | 59.11 | 3236 | 71.17 | 8.56 | 3.83 | 9.00 |
