# Supplementary material for: Hole in One: an element reduction approach to modeling bone porosity in finite element analysis
Source: PeerJ journal article supplement (doi:10.7717/peerj.8112), 2019-12-19
Supplement: Table_S4.docx [file Table_S4.docx]

| **Nodes** | **T1** | | **T2** | | **T3** | | **T4** | | **Mean** | **stdev** | **sterr** | **95% CI** |
| --- | --- | --- | --- | --- | --- | --- | --- | --- | --- | --- | --- | --- |
| **CC (Mellivora)** | | | | | | | | | | | | |
| 1 | 46.65 | 5079 | 46.47 | 5042 | 57.40 | 5035 | 64.37 | 4215 | 53.72 | 8.75 | 3.91 | 9.20 |
| 2 | 58.39 | 6816 | 22.33 | 1465 | 46.42 | 6946 | 60.16 | 226 | 46.83 | 17.44 | 7.80 | 18.35 |
| 3 | 85.92 | 899 | 17.03 | 332 | 44.01 | 558 | 72.07 | 827 | 54.76 | 30.60 | 13.69 | 32.20 |
| 4 | 81.71 | 1075 | 38.57 | 946 | 43.67 | 988 | 55.64 | 722 | 54.90 | 19.25 | 8.61 | 20.26 |
| 5 | 57.34 | 539 | 51.63 | 921 | 58.25 | 1017 | 49.28 | 380 | 54.12 | 4.36 | 1.95 | 4.59 |
| 6 | 47.21 | 4918 | 51.49 | 6095 | 60.41 | 5569 | 55.90 | 5888 | 53.75 | 5.68 | 2.54 | 5.98 |
| 7 | 46.44 | 6517 | 46.58 | 5648 | 54.60 | 6065 | 50.66 | 5874 | 49.57 | 3.88 | 1.74 | 4.08 |
| 8 | 38.44 | 5167 | 42.41 | 6175 | 50.55 | 6220 | 46.75 | 4734 | 44.54 | 5.25 | 2.35 | 5.53 |
| 9 | 13.44 | 6127 | 33.61 | 5836 | 31.55 | 6594 | 27.81 | 5359 | 26.60 | 9.10 | 4.07 | 9.57 |
| 10 | 11.32 | 4266 | 7.34 | 6381 | 10.60 | 1683 | 10.59 | 5211 | 9.96 | 1.78 | 0.80 | 1.87 |
| **PC (7.8%)** | | | | | | | | | | | | |
| 1 | 38.77 | 2382 | 38.69 | 2394 | 40.11 | 2370 | 38.77 | 2382 | 39.09 | 0.68 | 0.31 | 0.72 |
| 2 | 52.78 | 2478 | 47.29 | 2490 | 50.64 | 2466 | 52.78 | 2478 | 50.87 | 2.59 | 1.16 | 2.73 |
| 3 | 53.32 | 2574 | 54.12 | 2586 | 51.77 | 2562 | 53.32 | 2574 | 53.13 | 0.98 | 0.44 | 1.04 |
| 4 | 56.78 | 2670 | 55.96 | 2682 | 55.67 | 2658 | 56.78 | 2670 | 56.30 | 0.57 | 0.25 | 0.60 |
| 5 | 56.10 | 2766 | 56.41 | 2778 | 56.28 | 2754 | 56.10 | 2766 | 56.22 | 0.15 | 0.07 | 0.16 |
| 6 | 53.77 | 2862 | 54.93 | 2874 | 54.13 | 2850 | 53.77 | 2862 | 54.15 | 0.55 | 0.25 | 0.58 |
| 7 | 50.46 | 2958 | 49.69 | 3018 | 58.68 | 2946 | 50.46 | 2958 | 52.32 | 4.26 | 1.90 | 4.48 |
| 8 | 43.37 | 3054 | 35.31 | 3114 | 42.49 | 3042 | 35.45 | 3102 | 39.15 | 4.37 | 1.96 | 4.60 |
| 9 | 29.55 | 3150 | 34.55 | 3210 | 28.16 | 3138 | 34.89 | 3198 | 31.79 | 3.43 | 1.54 | 3.61 |
| 10 | 42.96 | 3246 | 35.81 | 3258 | 39.21 | 3234 | 42.96 | 3246 | 40.23 | 3.44 | 1.54 | 3.62 |
| **MC (22 GPa)** | | | | | | | | | | | | |
| 1 | 35.21 | 2372 | 35.21 | 2384 | 35.06 | 2360 | 35.65 | 2397 | 35.28 | 0.25 | 0.11 | 0.27 |
| 2 | 44.56 | 2468 | 44.45 | 2480 | 44.56 | 2456 | 44.69 | 2493 | 44.57 | 0.10 | 0.04 | 0.10 |
| 3 | 49.46 | 2564 | 49.45 | 2576 | 49.44 | 2552 | 49.67 | 2589 | 49.51 | 0.11 | 0.05 | 0.12 |
| 4 | 50.93 | 2660 | 50.91 | 2672 | 50.91 | 2648 | 50.92 | 2685 | 50.92 | 0.01 | 0.01 | 0.01 |
| 5 | 50.96 | 2756 | 50.94 | 2768 | 50.92 | 2744 | 50.92 | 2781 | 50.94 | 0.02 | 0.01 | 0.02 |
| 6 | 50.56 | 2852 | 50.51 | 2864 | 50.44 | 2840 | 50.37 | 2877 | 50.47 | 0.09 | 0.04 | 0.09 |
| 7 | 48.89 | 2948 | 48.81 | 2960 | 48.57 | 2936 | 48.35 | 2973 | 48.65 | 0.25 | 0.11 | 0.26 |
| 8 | 43.71 | 3044 | 43.17 | 3056 | 42.85 | 3032 | 38.79 | 3069 | 42.13 | 2.25 | 1.01 | 2.37 |
| 9 | 35.71 | 3140 | 34.48 | 3152 | 34.31 | 3128 | 26.03 | 3165 | 32.63 | 4.44 | 1.99 | 4.68 |
| 10 | 32.80 | 3236 | 29.36 | 3248 | 36.20 | 3224 | 30.99 | 3261 | 32.34 | 2.93 | 1.31 | 3.08 |
| **PC + MC** | | | | | | | | | | | | |
| 1 | 39.35 | 2379 | 38.46 | 2392 | 37.63 | 2356 | 39.75 | 2368 | 38.80 | 0.95 | 0.42 | 1.00 |
| 2 | 47.85 | 2475 | 47.24 | 2488 | 47.80 | 2452 | 48.53 | 2464 | 47.86 | 0.53 | 0.24 | 0.55 |
| 3 | 53.51 | 2571 | 56.39 | 2584 | 54.82 | 2548 | 53.05 | 2560 | 54.44 | 1.50 | 0.67 | 1.57 |
| 4 | 56.29 | 2667 | 57.47 | 2680 | 57.63 | 2692 | 52.79 | 2656 | 56.05 | 2.25 | 1.01 | 2.37 |
| 5 | 52.64 | 2763 | 58.89 | 2776 | 56.29 | 2788 | 57.26 | 2752 | 56.27 | 2.65 | 1.18 | 2.79 |
| 6 | 56.04 | 2859 | 53.61 | 2872 | 51.65 | 2884 | 55.13 | 2848 | 54.11 | 1.92 | 0.86 | 2.02 |
| 7 | 53.79 | 2955 | 53.54 | 2968 | 48.80 | 2980 | 52.64 | 2944 | 52.19 | 2.32 | 1.04 | 2.44 |
| 8 | 42.86 | 3051 | 43.06 | 3064 | 36.06 | 3076 | 39.77 | 3040 | 40.44 | 3.29 | 1.47 | 3.46 |
| 9 | 37.30 | 3147 | 26.95 | 3160 | 27.31 | 3124 | 25.51 | 3136 | 29.27 | 5.41 | 2.42 | 5.70 |
| 10 | 37.03 | 3195 | 29.00 | 3208 | 24.39 | 3172 | 25.13 | 3184 | 28.89 | 5.79 | 2.59 | 6.10 |
