# Supplementary material for: Hole in One: an element reduction approach to modeling bone porosity in finite element analysis
Source: PeerJ journal article supplement (doi:10.7717/peerj.8112), 2019-12-19
Supplement: Table_S5.docx [file Table_S5.docx]

| **Nodes** | **T1** | | **T2** | | **T3** | | **T4** | | **Mean** | **stdev** | **sterr** | **95% CI** |
| --- | --- | --- | --- | --- | --- | --- | --- | --- | --- | --- | --- | --- |
| **CC (Enhydra)** | | | | | | | | | | | | |
| 1 | 68.39 | 22274 | 52.04 | 47669 | 37.96 | 49002 | 103.15 | 17724 | 65.39 | 28.08 | 12.56 | 29.55 |
| 2 | 108.59 | 45197 | 72.93 | 14722 | 32.63 | 44684 | 83.55 | 44469 | 74.43 | 31.62 | 14.14 | 33.27 |
| 3 | 138.65 | 45293 | 9.33 | 441 | 26.00 | 44719 | 86.87 | 48104 | 65.21 | 59.23 | 26.49 | 62.32 |
| 4 | 214.49 | 46757 | 134.27 | 16130 | 23.03 | 8148 | 103.50 | 44994 | 118.82 | 79.17 | 35.40 | 83.31 |
| 5 | 291.62 | 820 | 37.09 | 9725 | 32.32 | 9909 | 126.28 | 44 | 121.83 | 121.17 | 54.19 | 127.50 |
| 6 | 161.61 | 40548 | 20.62 | 10670 | 42.88 | 136 | 99.45 | 12553 | 81.14 | 63.08 | 28.21 | 66.38 |
| 7 | 83.49 | 43844 | 35.73 | 23169 | 58.21 | 44232 | 77.64 | 7558 | 63.77 | 21.59 | 9.66 | 22.72 |
| 8 | 61.24 | 29483 | 41.66 | 50763 | 54.59 | 1755 | 30.21 | 8555 | 46.92 | 13.79 | 6.17 | 14.51 |
| 9 | 21.42 | 6387 | 21.69 | 2407 | 39.36 | 50574 | 50.38 | 9576 | 33.21 | 14.19 | 6.35 | 14.94 |
| 10 | 9.35 | 5560 | 4.81 | 31589 | 9.44 | 8768 | 7.00 | 5552 | 7.65 | 2.20 | 0.98 | 2.32 |
| **PC (16.5%)** | | | | | | | | | | | | |
| 1 | 40.85 | 2360 | 42.66 | 2372 | 43.06 | 2384 | 44.86 | 2396 | 42.86 | 1.64 | 0.74 | 1.73 |
| 2 | 54.43 | 2456 | 53.00 | 2468 | 55.36 | 2480 | 61.65 | 2492 | 56.11 | 3.82 | 1.71 | 4.02 |
| 3 | 62.19 | 2552 | 60.29 | 2564 | 57.66 | 2576 | 57.68 | 2588 | 59.46 | 2.20 | 0.98 | 2.32 |
| 4 | 58.83 | 2648 | 61.65 | 2660 | 65.13 | 2672 | 53.73 | 2684 | 59.84 | 4.82 | 2.15 | 5.07 |
| 5 | 61.03 | 2744 | 60.48 | 2756 | 57.80 | 2768 | 63.23 | 2780 | 60.64 | 2.23 | 1.00 | 2.35 |
| 6 | 59.83 | 2840 | 60.96 | 2852 | 62.27 | 2864 | 57.91 | 2876 | 60.24 | 1.85 | 0.83 | 1.95 |
| 7 | 53.89 | 2936 | 55.25 | 2948 | 55.21 | 2960 | 55.11 | 2972 | 54.87 | 0.66 | 0.29 | 0.69 |
| 8 | 46.51 | 3032 | 57.59 | 3044 | 32.63 | 3104 | 48.36 | 3068 | 46.27 | 10.31 | 4.61 | 10.85 |
| 9 | 31.12 | 3128 | 28.30 | 3140 | 30.27 | 3152 | 40.89 | 3164 | 32.65 | 5.62 | 2.52 | 5.92 |
| 10 | 36.04 | 3224 | 40.18 | 3236 | 30.56 | 3248 | 36.38 | 3260 | 35.79 | 3.96 | 1.77 | 4.17 |
| **MC (20 GPa)** | | | | | | | | | | | | |
| 1 | 35.20 | 2372 | 35.22 | 2384 | 35.07 | 2360 | 35.63 | 2397 | 35.28 | 0.24 | 0.11 | 0.26 |
| 2 | 44.54 | 2468 | 44.47 | 2480 | 44.58 | 2456 | 44.66 | 2493 | 44.56 | 0.08 | 0.03 | 0.08 |
| 3 | 49.45 | 2564 | 49.47 | 2576 | 49.46 | 2552 | 49.66 | 2589 | 49.51 | 0.10 | 0.04 | 0.11 |
| 4 | 51.03 | 2660 | 50.83 | 2672 | 50.83 | 2648 | 51.01 | 2685 | 50.92 | 0.11 | 0.05 | 0.11 |
| 5 | 51.47 | 2756 | 50.49 | 2768 | 50.45 | 2744 | 51.42 | 2781 | 50.96 | 0.56 | 0.25 | 0.59 |
| 6 | 52.10 | 2852 | 49.04 | 2864 | 48.98 | 2840 | 51.99 | 2877 | 50.53 | 1.75 | 0.78 | 1.84 |
| 7 | 52.59 | 2948 | 44.97 | 2960 | 44.79 | 2936 | 52.50 | 2973 | 48.71 | 4.43 | 1.98 | 4.66 |
| 8 | 49.10 | 3044 | 34.71 | 3056 | 34.70 | 3032 | 48.12 | 3069 | 41.66 | 8.04 | 3.60 | 8.46 |
| 9 | 33.37 | 3140 | 22.72 | 3152 | 22.58 | 3128 | 33.98 | 3165 | 28.16 | 6.37 | 2.85 | 6.70 |
| 10 | 35.14 | 3236 | 24.01 | 3248 | 27.83 | 3224 | 37.06 | 3261 | 31.01 | 6.13 | 2.74 | 6.45 |
