# Supplementary material for: Hole in One: an element reduction approach to modeling bone porosity in finite element analysis
Source: PeerJ journal article supplement (doi:10.7717/peerj.8112), 2019-12-19
Supplement: Table_S6.docx [file Table_S6.docx]

| **Nodes** | **T1** | | **T2** | | **T3** | | **T4** | | **Mean** | **stdev** | **sterr** | **95% CI** |
| --- | --- | --- | --- | --- | --- | --- | --- | --- | --- | --- | --- | --- |
| **CC (Arctonyx)** | | | | | | | | | | | | |
| 1 | 77.82 | 55186 | 72.20 | 21476 | 72.38 | 55364 | 71.51 | 60360 | 73.48 | 2.92 | 1.31 | 3.07 |
| 2 | 171.63 | 52483 | 81.94 | 54114 | 61.41 | 34672 | 115.49 | 55328 | 107.62 | 48.14 | 21.53 | 50.66 |
| 3 | 172.87 | 58891 | 93.82 | 13988 | 14.87 | 45405 | 215.45 | 49156 | 124.25 | 88.64 | 39.64 | 93.27 |
| 4 | 117.27 | 5809 | 60.20 | 41737 | 19.03 | 48470 | 151.23 | 4100 | 86.94 | 58.82 | 26.31 | 61.90 |
| 5 | 148.35 | 56896 | 166.48 | 44883 | 39.09 | 55025 | 218.15 | 7830 | 143.02 | 75.33 | 33.69 | 79.27 |
| 6 | 118.63 | 57634 | 153.83 | 47784 | 22.15 | 9666 | 119.80 | 52787 | 103.60 | 56.70 | 25.36 | 59.67 |
| 7 | 70.70 | 60507 | 77.92 | 49758 | 35.14 | 53705 | 115.75 | 53728 | 74.88 | 33.05 | 14.78 | 34.77 |
| 8 | 51.39 | 56706 | 81.83 | 53058 | 19.59 | 57448 | 76.83 | 48473 | 57.41 | 28.52 | 12.75 | 30.01 |
| 9 | 35.96 | 52431 | 50.93 | 55820 | 17.73 | 60351 | 49.90 | 52518 | 38.63 | 15.51 | 6.94 | 16.33 |
| 10 | 24.91 | 48056 | 13.64 | 60710 | 10.35 | 56448 | 27.43 | 59492 | 19.08 | 8.36 | 3.74 | 8.80 |
| **PC (26.1%)** | | | | | | | | | | | | |
| 1 | 49.92 | 2368 | 53.77 | 2380 | 49.50 | 2392 | 45.67 | 2356 | 49.72 | 3.31 | 1.48 | 3.48 |
| 2 | 59.26 | 2464 | 68.43 | 2476 | 65.49 | 2488 | 74.02 | 2452 | 66.80 | 6.15 | 2.75 | 6.47 |
| 3 | 72.28 | 2560 | 84.16 | 2572 | 71.80 | 2584 | 71.19 | 2548 | 74.86 | 6.22 | 2.78 | 6.54 |
| 4 | 76.88 | 11568 | 66.70 | 2668 | 79.65 | 2680 | 69.31 | 2644 | 73.13 | 6.12 | 2.74 | 6.44 |
| 5 | 82.80 | 2752 | 75.28 | 6614 | 80.67 | 2776 | 75.72 | 2740 | 78.62 | 3.71 | 1.66 | 3.90 |
| 6 | 65.45 | 2848 | 72.42 | 2860 | 76.55 | 2872 | 76.44 | 2836 | 72.71 | 5.21 | 2.33 | 5.48 |
| 7 | 62.20 | 2944 | 75.69 | 2956 | 67.66 | 2968 | 75.96 | 2932 | 70.38 | 6.67 | 2.98 | 7.02 |
| 8 | 68.78 | 2992 | 54.73 | 3052 | 60.27 | 3064 | 59.13 | 3028 | 60.73 | 5.88 | 2.63 | 6.18 |
| 9 | 52.17 | 3088 | 40.52 | 3148 | 33.49 | 3160 | 39.97 | 3124 | 41.54 | 7.77 | 3.48 | 8.18 |
| 10 | 34.39 | 3184 | 53.62 | 3244 | 46.64 | 3256 | 66.01 | 3220 | 50.16 | 13.22 | 5.91 | 13.91 |
| **MC (16 GPa)** | | | | | | | | | | | | |
| 1 | 34.78 | 2376 | 30.67 | 2340 | 35.86 | 2401 | 36.10 | 2365 | 34.35 | 2.52 | 1.13 | 2.65 |
| 2 | 44.23 | 2472 | 40.42 | 2436 | 45.16 | 2497 | 45.05 | 2461 | 43.71 | 2.24 | 1.00 | 2.36 |
| 3 | 49.46 | 2569 | 47.39 | 2532 | 49.51 | 2593 | 49.51 | 2557 | 48.97 | 1.05 | 0.47 | 1.10 |
| 4 | 50.81 | 2664 | 50.37 | 2628 | 50.83 | 2689 | 50.77 | 2653 | 50.69 | 0.22 | 0.10 | 0.23 |
| 5 | 51.14 | 2761 | 50.83 | 2724 | 51.10 | 2785 | 50.66 | 2749 | 50.93 | 0.23 | 0.10 | 0.24 |
| 6 | 51.19 | 2808 | 50.16 | 2820 | 51.07 | 2881 | 49.83 | 2845 | 50.56 | 0.67 | 0.30 | 0.70 |
| 7 | 51.49 | 2905 | 47.96 | 2916 | 49.84 | 2977 | 47.19 | 2941 | 49.12 | 1.93 | 0.87 | 2.04 |
| 8 | 50.06 | 3000 | 41.04 | 3012 | 41.43 | 3073 | 38.35 | 3037 | 42.72 | 5.08 | 2.27 | 5.34 |
| 9 | 34.66 | 3145 | 25.08 | 3156 | 28.04 | 3169 | 25.62 | 3133 | 28.35 | 4.40 | 1.97 | 4.63 |
| 10 | 40.60 | 3241 | 28.23 | 3252 | 35.05 | 3265 | 32.19 | 3229 | 34.02 | 5.20 | 2.33 | 5.47 |
| **PC + MC** | | | | | | | | | | | | |
| 1 | 45.67 | 2356 | 49.92 | 2368 | 53.77 | 2380 | 49.50 | 2392 | 49.72 | 3.31 | 1.48 | 3.48 |
| 2 | 67.87 | 2500 | 59.26 | 2464 | 68.43 | 2476 | 65.49 | 2488 | 65.26 | 4.20 | 1.88 | 4.42 |
| 3 | 78.93 | 2596 | 72.28 | 2560 | 84.16 | 2572 | 71.80 | 2584 | 76.79 | 5.89 | 2.63 | 6.20 |
| 4 | 80.55 | 2692 | 76.91 | 2656 | 66.70 | 2668 | 79.65 | 2680 | 75.95 | 6.36 | 2.84 | 6.69 |
| 5 | 79.39 | 2788 | 82.80 | 2752 | 80.80 | 2764 | 80.67 | 2776 | 80.92 | 1.41 | 0.63 | 1.48 |
| 6 | 70.28 | 9327 | 65.45 | 2848 | 72.42 | 2860 | 76.55 | 2872 | 71.18 | 4.62 | 2.07 | 4.86 |
| 7 | 72.94 | 2980 | 62.20 | 2944 | 75.69 | 2956 | 67.66 | 2968 | 69.62 | 5.96 | 2.67 | 6.28 |
| 8 | 53.53 | 9237 | 68.88 | 3040 | 54.73 | 3052 | 60.27 | 3064 | 59.35 | 7.00 | 3.13 | 7.36 |
| 9 | 39.37 | 9078 | 36.53 | 3136 | 40.52 | 3148 | 33.49 | 3160 | 37.48 | 3.14 | 1.41 | 3.31 |
| 10 | 35.60 | 3172 | 34.39 | 3184 | 37.10 | 3196 | 30.83 | 3208 | 34.48 | 2.68 | 1.20 | 2.82 |
