# Supplementary material for: Hole in One: an element reduction approach to modeling bone porosity in finite element analysis
Source: PeerJ journal article supplement (doi:10.7717/peerj.8112), 2019-12-19
Supplement: Table_S7.docx [file Table_S7.docx]

| **Nodes** | **T1** | | **T2** | | **T3** | | **T4** | | **Mean** | **stdev** | **sterr** | **95% CI** |
| --- | --- | --- | --- | --- | --- | --- | --- | --- | --- | --- | --- | --- |
| **CC (Vulpex)** | | | | | | | | | | | | |
| 1 | 25.56 | 527 | 61.00 | 5990 | 27.55 | 5951 | 34.98 | 13484 | 37.27 | 16.33 | 7.30 | 17.18 |
| 2 | 35.54 | 538 | 161.50 | 4593 | 78.14 | 13560 | 39.04 | 457 | 78.56 | 58.57 | 26.19 | 61.63 |
| 3 | 81.23 | 6874 | 133.46 | 3336 | 255.99 | 18239 | 45.03 | 32122 | 128.93 | 92.16 | 41.21 | 96.98 |
| 4 | 113.81 | 1486 | 86.00 | 6690 | 295.41 | 18204 | 55.33 | 739 | 137.64 | 107.86 | 48.24 | 113.50 |
| 5 | 91.41 | 1406 | 236.45 | 8009 | 72.81 | 20698 | 90.87 | 3810 | 122.88 | 76.20 | 34.08 | 80.19 |
| 6 | 209.11 | 2290 | 192.92 | 8556 | 13.71 | 2462 | 103.02 | 3432 | 129.69 | 90.31 | 40.39 | 95.04 |
| 7 | 45.65 | 17110 | 183.85 | 1509 | 197.80 | 22675 | 102.41 | 17639 | 132.43 | 71.53 | 31.99 | 75.27 |
| 8 | 38.47 | 12418 | 165.04 | 1738 | 15.74 | 666 | 92.43 | 4489 | 77.92 | 66.39 | 29.69 | 69.86 |
| 9 | 26.87 | 33149 | 59.42 | 1379 | 24.40 | 8814 | 70.64 | 31881 | 45.33 | 23.22 | 10.39 | 24.44 |
| 10 | 6.71 | 32474 | 6.89 | 4328 | 5.77 | 32098 | 12.94 | 32818 | 8.08 | 3.28 | 1.47 | 3.45 |
| **PC (35.8 %)** | | | | | | | | | | | | |
| 1 | 52.96 | 2365 | 58.27 | 2378 | 56.25 | 2390 | 57.29 | 2354 | 56.19 | 2.31 | 1.03 | 2.43 |
| 2 | 73.08 | 2461 | 71.08 | 2474 | 71.57 | 2486 | 65.74 | 2450 | 70.37 | 3.20 | 1.43 | 3.37 |
| 3 | 72.83 | 2557 | 87.36 | 2570 | 86.67 | 2582 | 75.68 | 2546 | 80.63 | 7.46 | 3.34 | 7.86 |
| 4 | 69.54 | 2653 | 81.68 | 2666 | 78.04 | 2678 | 75.88 | 2642 | 76.28 | 5.10 | 2.28 | 5.36 |
| 5 | 72.34 | 2749 | 78.85 | 6622 | 94.41 | 2774 | 77.75 | 2738 | 80.84 | 9.48 | 4.24 | 9.98 |
| 6 | 85.37 | 2845 | 78.09 | 2858 | 75.39 | 2870 | 81.09 | 2834 | 79.99 | 4.28 | 1.91 | 4.50 |
| 7 | 73.91 | 2941 | 80.06 | 2954 | 66.43 | 2966 | 63.22 | 2930 | 70.90 | 7.57 | 3.38 | 7.96 |
| 8 | 66.34 | 3037 | 62.27 | 3050 | 55.72 | 3062 | 61.31 | 3026 | 61.41 | 4.38 | 1.96 | 4.60 |
| 9 | 65.29 | 3133 | 42.28 | 3146 | 39.43 | 3158 | 46.30 | 3122 | 48.33 | 11.65 | 5.21 | 12.26 |
| 10 | 39.80 | 3229 | 51.02 | 3242 | 44.83 | 3254 | 55.66 | 3218 | 47.83 | 6.95 | 3.11 | 7.32 |
| **MC (10 GPa)** | | | | | | | | | | | | |
| 1 | 35.21 | 2372 | 35.21 | 2384 | 35.06 | 2360 | 35.65 | 2397 | 35.28 | 0.25 | 0.11 | 0.27 |
| 2 | 44.57 | 2468 | 44.45 | 2480 | 44.55 | 2456 | 44.69 | 2493 | 44.57 | 0.10 | 0.04 | 0.10 |
| 3 | 49.47 | 2564 | 49.44 | 2576 | 49.43 | 2552 | 49.68 | 2589 | 49.51 | 0.12 | 0.05 | 0.12 |
| 4 | 50.96 | 2660 | 50.87 | 2672 | 50.88 | 2648 | 50.94 | 2685 | 50.91 | 0.05 | 0.02 | 0.05 |
| 5 | 51.07 | 2756 | 50.84 | 2768 | 50.81 | 2744 | 50.99 | 2781 | 50.93 | 0.12 | 0.06 | 0.13 |
| 6 | 50.94 | 2852 | 50.40 | 2864 | 50.32 | 2840 | 50.60 | 2877 | 50.57 | 0.28 | 0.12 | 0.29 |
| 7 | 50.64 | 2948 | 49.45 | 2960 | 49.13 | 2936 | 49.27 | 2973 | 49.62 | 0.69 | 0.31 | 0.73 |
| 8 | 52.66 | 3044 | 49.56 | 3056 | 48.51 | 3032 | 41.87 | 3069 | 48.15 | 4.55 | 2.03 | 4.78 |
| 9 | 57.92 | 3140 | 56.57 | 3152 | 53.83 | 3128 | 35.95 | 3165 | 51.07 | 10.22 | 4.57 | 10.76 |
| 10 | 43.97 | 3236 | 36.35 | 3248 | 41.01 | 3224 | 31.08 | 3261 | 38.10 | 5.64 | 2.52 | 5.93 |
| **PC + MC** | | | | | | | | | | | | |
| 1 | 39.35 | 2379 | 38.46 | 2392 | 37.63 | 2356 | 39.75 | 2368 | 38.80 | 0.95 | 0.42 | 1.00 |
| 2 | 47.85 | 2475 | 47.24 | 2488 | 47.80 | 2452 | 48.53 | 2464 | 47.86 | 0.53 | 0.24 | 0.55 |
| 3 | 53.51 | 2571 | 56.39 | 2584 | 54.82 | 2548 | 53.05 | 2560 | 54.44 | 1.50 | 0.67 | 1.57 |
| 4 | 56.29 | 2667 | 57.47 | 2680 | 57.63 | 2692 | 52.79 | 2656 | 56.05 | 2.25 | 1.01 | 2.37 |
| 5 | 52.64 | 2763 | 58.89 | 2776 | 56.29 | 2788 | 57.26 | 2752 | 56.27 | 2.65 | 1.18 | 2.79 |
| 6 | 56.04 | 2859 | 53.61 | 2872 | 51.65 | 2884 | 55.13 | 2848 | 54.11 | 1.92 | 0.86 | 2.02 |
| 7 | 53.79 | 2955 | 53.54 | 2968 | 48.80 | 2980 | 52.64 | 2944 | 52.19 | 2.32 | 1.04 | 2.44 |
| 8 | 42.86 | 3051 | 43.06 | 3064 | 36.06 | 3076 | 39.77 | 3040 | 40.44 | 3.29 | 1.47 | 3.46 |
| 9 | 37.30 | 3147 | 26.95 | 3160 | 27.31 | 3124 | 25.51 | 3136 | 29.27 | 5.41 | 2.42 | 5.70 |
| 10 | 37.03 | 3195 | 29.00 | 3208 | 24.39 | 3172 | 25.13 | 3184 | 28.89 | 5.79 | 2.59 | 6.10 |
