# Supplementary material for: Hole in One: an element reduction approach to modeling bone porosity in finite element analysis
Source: PeerJ journal article supplement (doi:10.7717/peerj.8112), 2019-12-19
Supplement: Table_S8.docx [file Table_S8.docx]

| **Nodes** | **T1** | | **T2** | | **T3** | | **T4** | | **Mean** | **stdev** | **sterr** | **95% CI** |
| --- | --- | --- | --- | --- | --- | --- | --- | --- | --- | --- | --- | --- |
| **CC (Bassariscus)** | | | | | | | | | | | | |
| 1 | 68.64 | 8731 | 69.70 | 200 | 54.20 | 9351 | 74.30 | 4578 | 66.71 | 8.70 | 3.89 | 9.15 |
| 2 | 140.34 | 9071 | 132.53 | 9587 | 15.32 | 6753 | 83.25 | 4347 | 92.86 | 57.54 | 25.73 | 60.55 |
| 3 | 180.34 | 8886 | 60.46 | 9020 | 580.21 | 1065 | 105.29 | 3693 | 231.57 | 237.63 | 106.27 | 250.05 |
| 4 | 274.49 | 8319 | 85.52 | 4381 | 45.40 | 6026 | 223.34 | 6682 | 157.19 | 109.19 | 48.83 | 114.90 |
| 5 | 91.72 | 4117 | 79.98 | 6234 | 45.53 | 5428 | 199.93 | 7267 | 104.29 | 66.71 | 29.83 | 70.19 |
| 6 | 200.94 | 126 | 66.83 | 5620 | 56.08 | 8194 | 329.42 | 3674 | 163.32 | 128.86 | 57.63 | 135.60 |
| 7 | 183.43 | 1074 | 205.58 | 5824 | 193.07 | 5912 | 247.92 | 150 | 207.50 | 28.43 | 12.71 | 29.92 |
| 8 | 59.45 | 5997 | 104.04 | 8047 | 33.34 | 8406 | 100.86 | 6533 | 74.42 | 34.10 | 15.25 | 35.88 |
| 9 | 12.40 | 9700 | 36.62 | 546 | 52.32 | 9150 | 37.88 | 4256 | 34.80 | 16.55 | 7.40 | 17.41 |
| 10 | 11.99 | 8993 | 10.35 | 1654 | 26.92 | 7444 | 34.28 | 7754 | 20.89 | 11.63 | 5.20 | 12.24 |
| **PC (46.6 %)** | | | | | | | | | | | | |
| 1 | 68.67 | 2359 | 59.94 | 2371 | 65.70 | 2383 | 68.67 | 2359 | 65.74 | 4.12 | 1.84 | 4.33 |
| 2 | 86.16 | 2455 | 78.66 | 2467 | 80.30 | 2479 | 86.16 | 2455 | 82.82 | 3.91 | 1.75 | 4.12 |
| 3 | 89.88 | 2551 | 101.02 | 2563 | 91.96 | 2575 | 89.88 | 2551 | 93.18 | 5.32 | 2.38 | 5.59 |
| 4 | 103.03 | 2647 | 98.81 | 2659 | 117.76 | 2671 | 103.03 | 2647 | 105.66 | 8.31 | 3.72 | 8.74 |
| 5 | 100.26 | 2743 | 106.75 | 2755 | 79.88 | 2767 | 100.26 | 2743 | 96.79 | 11.68 | 5.22 | 12.29 |
| 6 | 109.33 | 2839 | 92.51 | 2851 | 83.55 | 2863 | 109.33 | 2839 | 98.68 | 12.83 | 5.74 | 13.50 |
| 7 | 111.45 | 2935 | 107.08 | 2947 | 106.54 | 2959 | 111.45 | 2935 | 109.13 | 2.68 | 1.20 | 2.82 |
| 8 | 71.17 | 3031 | 78.15 | 3043 | 79.52 | 3055 | 71.17 | 3031 | 75.00 | 4.46 | 1.99 | 4.69 |
| 9 | 64.28 | 9217 | 58.61 | 3139 | 45.72 | 3151 | 44.66 | 3127 | 53.32 | 9.68 | 4.33 | 10.18 |
| 10 | 43.37 | 3175 | 124.19 | 3233 | 45.85 | 3245 | 74.28 | 5511 | 71.92 | 37.56 | 16.80 | 39.53 |
| **MC (7 GPa)** | | | | | | | | | | | | |
| 1 | 35.31 | 2372 | 35.31 | 2384 | 35.16 | 2360 | 35.74 | 2397 | 35.38 | 0.25 | 0.11 | 0.26 |
| 2 | 44.60 | 2468 | 44.49 | 2480 | 44.60 | 2456 | 44.72 | 2493 | 44.60 | 0.09 | 0.04 | 0.10 |
| 3 | 49.46 | 2564 | 49.45 | 2576 | 49.44 | 2552 | 49.66 | 2589 | 49.50 | 0.10 | 0.05 | 0.11 |
| 4 | 50.91 | 2660 | 50.90 | 2672 | 50.90 | 2648 | 50.90 | 2685 | 50.90 | 0.00 | 0.00 | 0.01 |
| 5 | 50.89 | 2756 | 50.93 | 2768 | 50.90 | 2744 | 50.91 | 2781 | 50.91 | 0.02 | 0.01 | 0.02 |
| 6 | 50.28 | 2852 | 50.39 | 2864 | 50.35 | 2840 | 50.44 | 2877 | 50.36 | 0.07 | 0.03 | 0.07 |
| 7 | 47.88 | 2948 | 48.22 | 2960 | 48.09 | 2936 | 48.93 | 2973 | 48.28 | 0.46 | 0.20 | 0.48 |
| 8 | 39.08 | 3044 | 40.01 | 3056 | 39.64 | 3032 | 43.44 | 3069 | 40.54 | 1.97 | 0.88 | 2.07 |
| 9 | 24.02 | 3140 | 25.19 | 3152 | 26.21 | 3128 | 37.00 | 3165 | 28.11 | 5.99 | 2.68 | 6.31 |
| 10 | 32.23 | 3236 | 30.85 | 3248 | 31.22 | 3224 | 32.69 | 3261 | 31.75 | 0.86 | 0.38 | 0.90 |
| **PC + MC** | | | | | | | | | | | | |
| 1 | 57.29 | 2354 | 57.08 | 2366 | 58.27 | 2378 | 56.91 | 2391 | 57.39 | 0.61 | 0.27 | 0.64 |
| 2 | 65.74 | 2450 | 70.24 | 2462 | 71.08 | 2474 | 70.92 | 2487 | 69.49 | 2.53 | 1.13 | 2.66 |
| 3 | 75.68 | 2546 | 86.60 | 2558 | 87.36 | 2570 | 81.02 | 2583 | 82.67 | 5.45 | 2.44 | 5.73 |
| 4 | 75.88 | 2642 | 81.11 | 2654 | 81.68 | 2666 | 86.17 | 2679 | 81.21 | 4.21 | 1.88 | 4.43 |
| 5 | 77.75 | 2738 | 78.93 | 2750 | 82.63 | 2762 | 87.40 | 2775 | 81.68 | 4.34 | 1.94 | 4.57 |
| 6 | 81.09 | 2834 | 87.73 | 2846 | 77.22 | 2810 | 70.65 | 2871 | 79.17 | 7.15 | 3.20 | 7.52 |
| 7 | 63.22 | 2930 | 75.58 | 2893 | 76.99 | 2906 | 74.68 | 2967 | 72.62 | 6.33 | 2.83 | 6.67 |
| 8 | 61.31 | 3026 | 73.72 | 2989 | 78.56 | 3002 | 59.85 | 3063 | 68.36 | 9.22 | 4.12 | 9.70 |
| 9 | 46.30 | 3122 | 61.03 | 3085 | 55.70 | 3098 | 56.67 | 3159 | 54.93 | 6.20 | 2.77 | 6.52 |
| 10 | 32.84 | 3170 | 36.37 | 3181 | 29.97 | 3194 | 51.80 | 3207 | 37.74 | 9.73 | 4.35 | 10.24 |
